# Supplementary figures and images for: Mechanical force regulates ligand binding and function of PD-1
Source: PubMed Central journal article supplement — bioRxiv. 2023 Aug 15:2023.08.13.553152. Preprint. [Version 1] doi: 10.1101/2023.08.13.553152 (PMC10462004; doi:10.1101/2023.08.13.553152), 2023-08-15

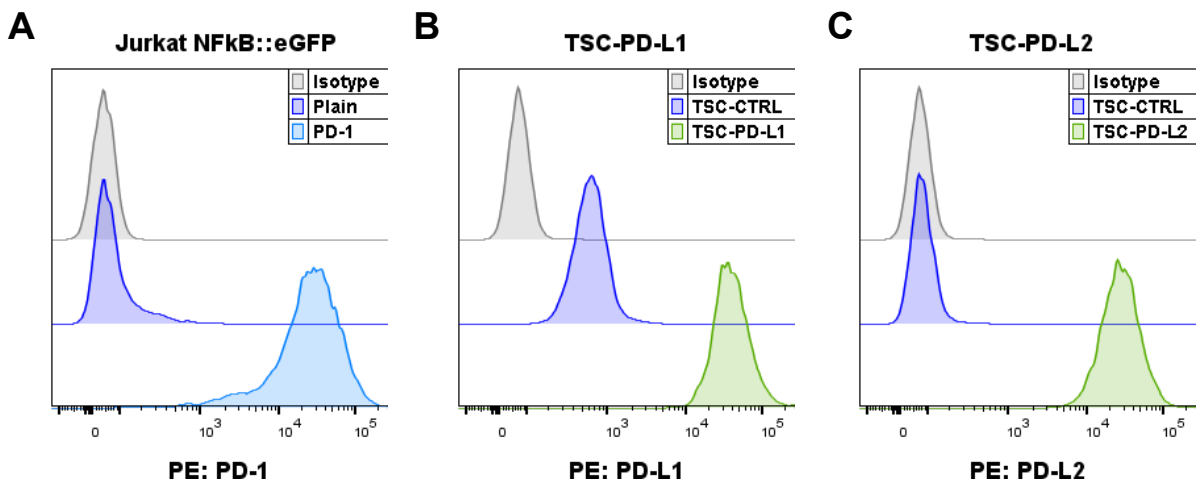

**Fig. S1**

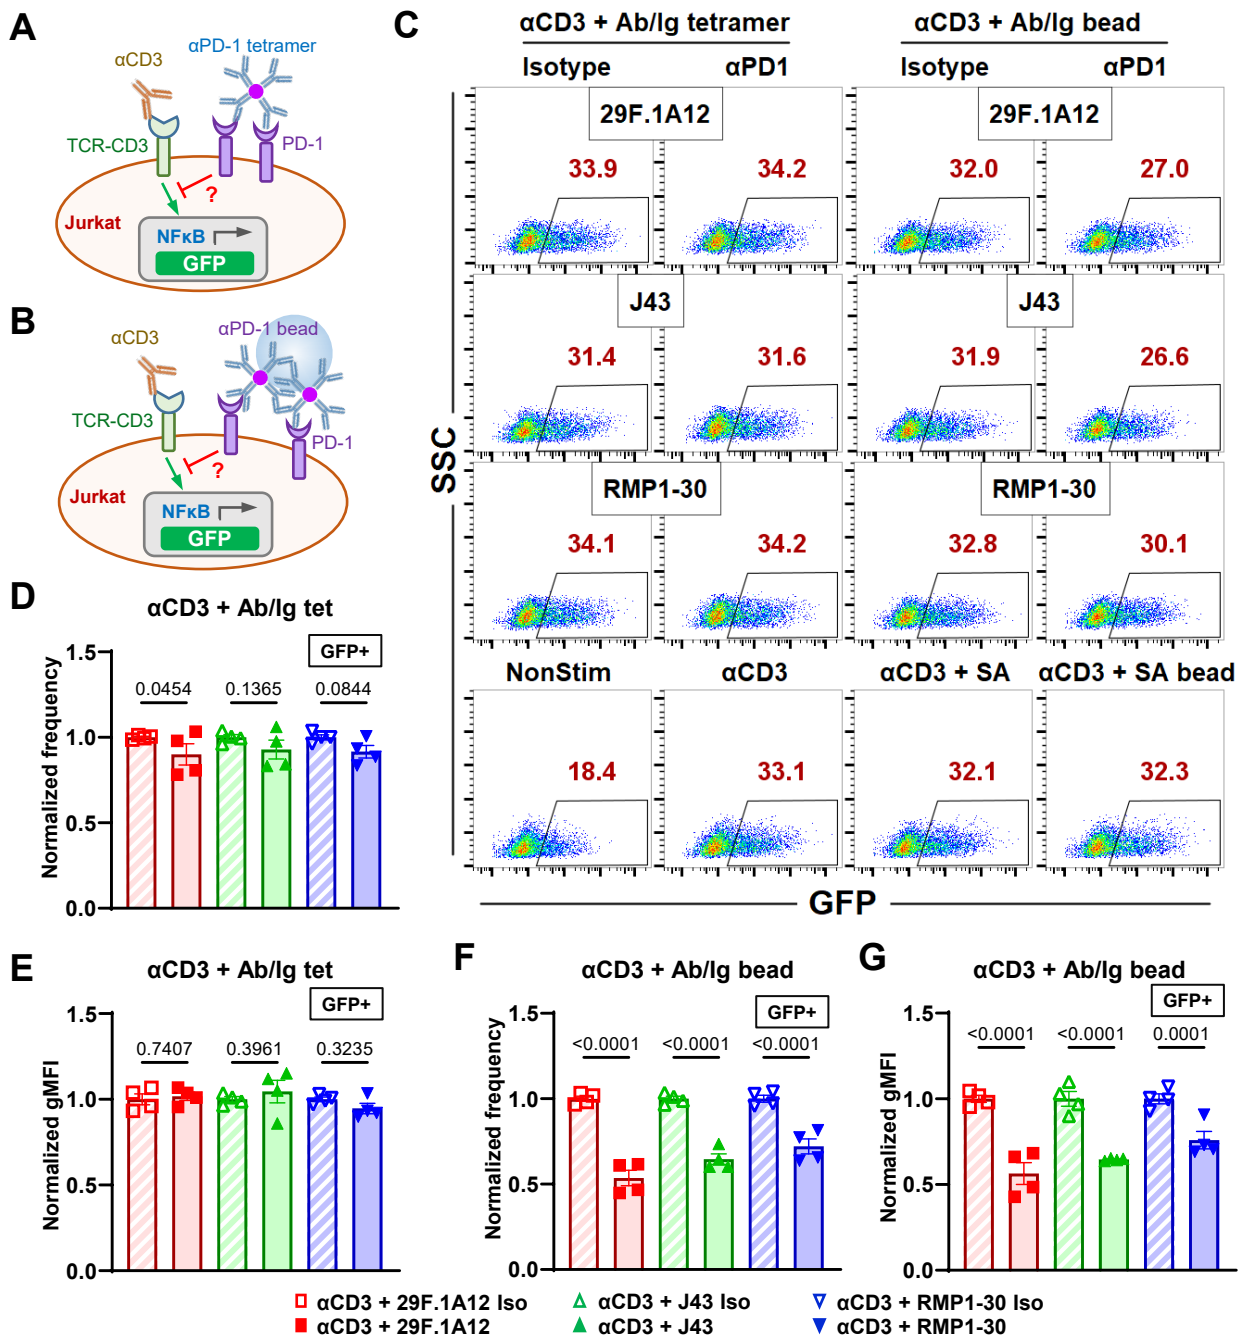

**Fig. S2**

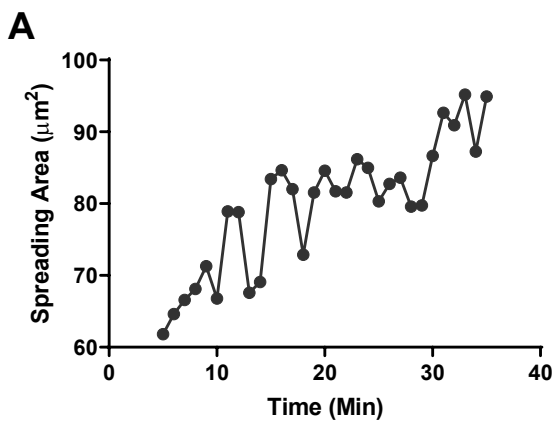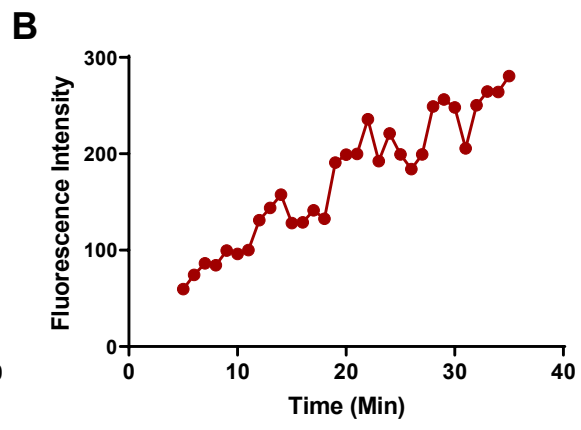

**Fig. S3**

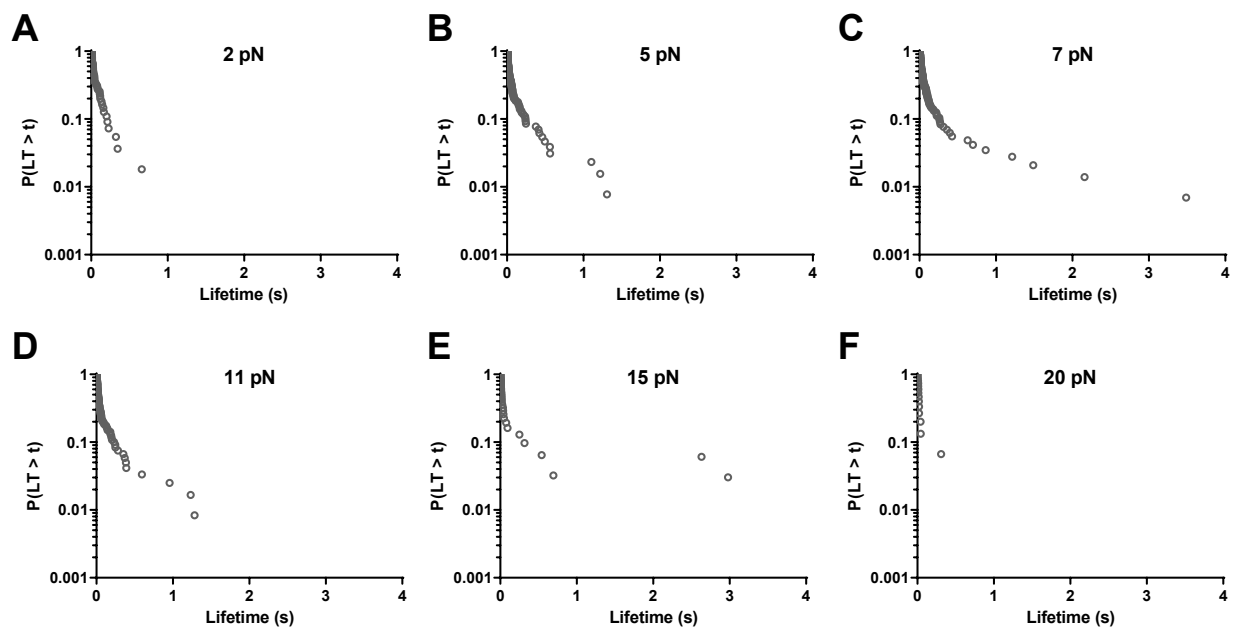

Fig. S4

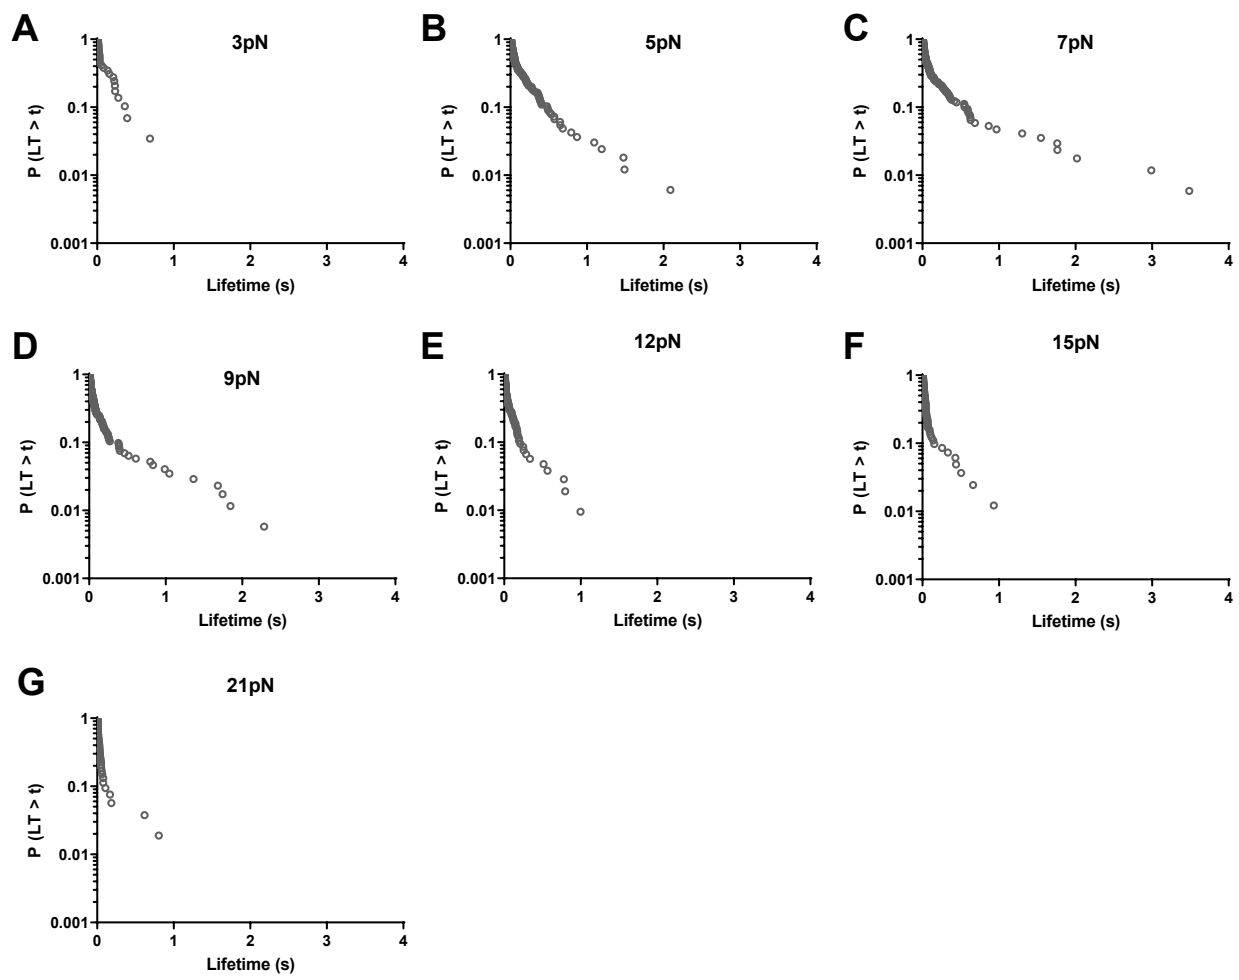

Fig. S5

Supplement: NIHPP2023.08.13.553152v1-supplement-1.pdf [file NIHPP2023.08.13.553152v1-supplement-1.pdf]
